# Supplementary material for: Otolith microchemistry and diadromy in Patagonian river fishes
Source: PeerJ. 2019 Jan 3;7:e6149. doi: 10.7717/peerj.6149 (PMC6321752; doi:10.7717/peerj.6149)
Supplement: Supplemental Information 2 — Each condition is progressively less restrictive in pruning the original data. The ID refers to the identifications given to each individual fish during sampling and analysis. The other columns report Species, Location of collection, the ontogenetic stage at the time of capture and the transect quality of the otolith data. ”F” stands for ”full”, a good quality transect, that was taken from edge-core-edge of the otolith, generally easy to interpret data.”H”, is a half transect, that was taken only from one edge to the core of the otolith. It is an interpretable transect. ”P” is ”partial”, approximately three quarters of a transect, going from edge-core some variable amount of data, without reaching the other side of the edge of the otolith. It is most of the time an interpretable transect. ”O”, stands for ”off” and it is a flagged transect as the spectrophotometer reading failed to go through the core of the otolith. Data may be interpretable, depending on how far the reading transect was taken from the center of the otolith. Caution should be observed when interpreting this data. [file peerj-07-6149-s002.xlsx]

## Sheet: Sheet1
	Values
Row Labels	Count of Species	Sum of 1	Count of 2	Count of 3	Count of 4	Count of 5	Count of 6	Count of 7	Count of 8
Aysen	8	13.2058	5	4	2
Baker	16	32.8972	8	8	3
Caro	14	12.2394
Lingue	2	4.1306
Palos	9	10.1467
Petrohue	6	10.361	1	1	1
S.Domingo	8	12.9273	6	6	5	3	1
Simpson	5	4.08391
Tocoihue	7	14.0399	3	3	2	1	1	1	1
Tolten-Peuco	4	6.92034
Tolten-Truful-truful	4	6.45758	1	1	1
O.tshawytscha	4	6.45758	1	1	1
Vargas	2	4.7051
O.kisutch	2	4.7051
Grand Total	85	132.115	24	23	14	4	2	1	1

## Sheet: AllSplits.csv
TABLE S2: Results from semisupervised CART analysis on Sr:Ca. Each condition is progressively less restrictive in pruning the original data. The ID refers to the identifications given to each individual fish during sampling and analysis. The other columns report Species, Location of collection, the ontogenetic stage at the time of capture and the transect quality of the otolith data. "F" stands f…
							Cond.=1.0																Cond.=0.7																				Cond.=0.5
							Split Means								Split Standard Deviations								Split Means										Split Standard Deviations										Split Means
	ID	Species	Location	Ontogenetic Stage	Transect Quality	Inferred migration pattern	1	2	3	4	5	6	7	8	1	2	3	4	5	6	7	8	1	2	3	4	5	6	7	8	9		1	2	3	4	5	6	7	8	9		1	2	3	4	5	6	7
Native Galaxiids	3093	A.zebra	Aysén-Caro	juvenile	F	freshwater	0.92904								0.143035
	3094	A.zebra	Aysén-Caro	juvenile	F	freshwater	0.971521								0.134315
	3095	A.zebra	Aysén-Caro	juvenile	P	freshwater	0.942968								0.110265
	3096	A.zebra	Aysén-Caro	juvenile	F	freshwater	1.01266								0.0786141
	3097	A.zebra	Aysén-Caro	juvenile	F	freshwater	0.882313								0.102454
	4110	A.zebra	Chiloé-Tocoihue	juvenile	F	brackish	2.13086								0.221344
	4111	A.zebra	Chiloé-Tocoihue	juvenile	F	brackish	2.57881								0.21463
	4114	A.zebra	Chiloé-Tocoihue	juvenile	F	brackish	2.40805								0.3674
	4359	A.taeniatus	Valdivia-Santo Domingo	adult	F	catadromous	1.71867	4.59427	1.77508						0.347635	0.516608	0.445872						1.71867	4.65285	3.48947	2.14684	1.37812						0.347635	0.455501	0.329882	0.25619	0.184843						1.71867	4.65285	3.48947	2.14684	1.37812
	4354	A.taeniatus	Valdivia-Santo Domingo	adult	F	amphidromous	1.79175	3.50468	4.94228	2.26486	3.95834	1.82737			0.303718	0.691055	0.466379	0.449284	0.491453	0.246708			1.79175	3.50468	4.94228	2.26486	3.95834	1.82737					0.303718	0.691055	0.466379	0.449284	0.491453	0.246708					1.79175	3.50468	4.94228	2.26486	3.95834	1.82737
	4357	A.taeniatus	Valdivia-Santo Domingo	adult	H	catadromous	0.977526	2.13932	4.23961	2.28877					0.152762	0.362718	0.46564	0.254184					0.977526	2.13932	4.23961	2.28877							0.152762	0.362718	0.46564	0.254184							0.977526	2.13932	3.66338	4.19947	4.82451	3.68158	2.28877
	4361	A.taeniatus	Valdivia-Santo Domingo	adult	H	catadromous	3.12539								1.17195								0.953478	1.77247	3.26035	3.99866	2.97371						0.27806	0.298647	0.336901	0.354549	0.365823						0.953478	1.77247	3.26035	3.99866	2.97371
	4360	A.taeniatus	Valdivia-Santo Domingo	adult	F	brackish	2.14472								0.334948
	4379	A.taeniatus	Valdivia-Santo Domingo	adult	O	(omitted)	1.13417	2.17794	3.45279	4.47052	5.66647				0.40564	0.297365	0.243035	0.346207	0.365271				1.13417	2.17794	3.45279	4.47052	5.66647						0.40564	0.297365	0.243035	0.346207	0.365271						1.13417	2.17794	3.45279	4.47052	5.66647
	4380	A.taeniatus	Valdivia-Santo Domingo	adult	H	amphidromous	1.43943	3.32392	1.57491	3.21974	4.88072				0.396376	0.600073	0.364062	0.446405	0.374359				1.26541	1.9702	3.32392	1.57491	3.21974	4.88072					0.270701	0.190682	0.600073	0.364062	0.446405	0.374359					1.26541	1.9702	2.76129	3.71688	2.61781	3.73154	1.57491
	4382	A.taeniatus	Valdivia-Santo Domingo	adult	F	catadromous	0.753659	1.75815	4.41956	1.70677					0.263475	0.414213	0.571183	0.382283					0.753659	1.75815	3.49073	5.12747	4.3583	1.70677					0.263475	0.414213	0.377318	0.460255	0.398894	0.382283					0.753659	1.75815	3.49073	5.12747	4.3583	1.70677
	4369	A.taeniatus	Valdivia-Lingue	adult	H	catadromous	2.19116								1.02425								1.53712	2.39459	3.74885								0.179564	0.327363	0.352445								1.53712	2.39459	3.74885
	4370	A.taeniatus	Valdivia-Lingue	adult	H	catadromous	1.93478								0.981215																												1.65484	1.11183	1.76187	2.66864	3.42869	2.79421
	311	A.taeniatus	Aysén-Palos	adult	H	catadromous	1.60836								0.858671
	312	A.taeniatus	Aysén-Palos	adult	H	catadromous	2.03533								1.07155								0.860704	2.13745	2.99661								0.200939	0.18475	0.192864								0.860704	2.13745	2.99661
	313	A.taeniatus	Aysén-Palos	adult	O	(omitted)	0.828712								0.115973																												1.36513	0.820265
	3143	A.taeniatus	Aysén-Caro	juvenile	F	freshwater	0.667154								0.0717465
	3145	A.taeniatus	Aysén-Caro	juvenile	F	freshwater	0.735393								0.110892																												1.30254	0.725443
	3436	A.marinus	Baker-estuary	adult	P	catadromous	2.60907	3.87733	5.7537						0.407229	0.214728	0.783268						2.60907	3.87733	4.7152	6.12871							0.407229	0.214728	0.371619	0.498804							1.83318	3.01094	2.39932	3.87733	4.7152	6.12871
	3441	A.marinus	Baker-estuary	adult	H	catadromous	3.8895								1.32887								2.23992	3.09411	4.91638								0.213107	0.240584	0.415926								2.23992	3.09411	4.91638
	3445	A.marinus	Baker-estuary	adult	H	catadromous	2.97978	4.94509	3.92746						0.275278	0.709065	0.473619						2.97978	3.957	5.14271	3.92746							0.275278	0.176577	0.599642	0.473619							2.97978	3.957	5.40246	4.79639	4.04419	3.2738
	3694	A.marinus	Baker-estuary	adult	H	catadromous	1.4199	2.42074	4.00344	5.44732	4.3636				0.197857	0.400804	0.242459	0.367255	0.358438				1.4199	2.42074	4.00344	5.44732	4.3636						0.197857	0.400804	0.242459	0.367255	0.358438						1.4199	2.33932	3.31629	4.00344	5.44732	4.3636
	3695	A.marinus	Baker-estuary	adult	H	catadromous	3.72958								1.28041								2.44731	3.34467	4.35958	5.78647	4.3992						0.402826	0.276457	0.333588	0.534632	0.240095						2.06612	2.68556	3.34467	4.35958	5.94783	5.23785	4.3992
	3697	A.marinus	Baker-estuary	adult	P	catadromous	1.8168	2.9555	4.60899	3.36794					0.421194	0.229301	0.598444	0.285255					1.8168	2.9555	4.60899	3.36794							0.421194	0.229301	0.598444	0.285255							1.56111	2.13338	2.9555	3.47756	4.33695	5.38648	4.79427
	3698	A.marinus	Baker-estuary	adult	H	catadromous	1.04344	2.43889	5.01462						0.206099	0.342902	0.267841						1.04344	2.32908	3.22586	5.01462							0.206099	0.145605	0.322176	0.267841							1.04344	2.32908	3.22586	5.01462
	274	G.platei	Aysén-Palos	adult	F	freshwater	0.824142								0.18591
	315	G.platei	Aysén-Palos	adult	F	freshwater	0.68619								0.119568
	4081	G.maculatus	Chiloé-Tocoihue	adult	H	catadromous	1.34372	3.50924	5.85663	8.0741					0.340416	0.752392	0.616527	0.603683					1.34372	3.50924	5.85663	8.0741							0.340416	0.752392	0.616527	0.603683							1.34372	3.50924	5.85663	8.0741
	4082	G.maculatus	Chiloé-Tocoihue	adult	H	catadromous	1.16587	3.84904	6.41215	8.1884					0.43841	0.839443	0.775207	0.446554					1.16587	3.84904	6.41215	8.1884							0.43841	0.839443	0.775207	0.446554							1.16587	3.84904	6.41215	8.1884
	4084	G.maculatus	Chiloé-Tocoihue	adult	F	brackish	2.45471								0.30146
	4085	G.maculatus	Chiloé-Tocoihue	adult	F	amphidromous	1.72707	4.37394	5.85604	2.698	4.28792	6.26832	4.25552	1.49226	0.648668	0.428119	0.43714	0.546925	0.475539	0.735383	0.644335	0.497819	1.72707	4.37394	5.85604	2.698	4.28792	6.26832	4.25552	2.20398	1.24106		0.648668	0.428119	0.43714	0.546925	0.475539	0.735383	0.644335	0.299637	0.236011		1.72707	4.37394	5.85604	2.698	4.28792	6.26832	4.25552
Introduced Salmonids	309	S.trutta	Aysén-Palos	adult	F	freshwater	1.11126								0.177476
	317	S.trutta	Aysén-Palos	adult	F	freshwater	0.953261								0.18516
	318	S.trutta	Aysén-Palos	adult	F	freshwater	1.058								0.207626
	319	S.trutta	Aysén-Palos	adult	F	freshwater	1.01907								0.196073
	2830	S.trutta	Aysén-Caro	juvenile	F	freshwater	0.955104								0.202727
	3024	S.trutta	Aysén-Caro	juvenile	F	freshwater	0.902297								0.186617
	3058	S.trutta	Aysén-Caro	juvenile	H	freshwater	0.833262								0.1346
	3059	S.trutta	Aysén-Caro	juvenile	F	freshwater	0.971275								0.156478
	3426	S.trutta	Baker-estuary	juvenile	F	anadromous	0.903982								0.277798																												0.858546	1.52459	0.790143
	4282	O.tshawytscha	Aysén-Ñireguao	adult	O	(omitted)	1.92573								0.336255
	4283	O.tshawytscha	Aysén-Ñireguao	adult	F	anadromous	1.49892								0.708585								2.02493	0.742422	2.01523	0.639743							0.445394	0.118241	0.284194	0.162537							1.11891	1.9067	2.45592	0.742422	2.0196	0.65779
	4284	O.tshawytscha	Aysén-Ñireguao	adult	F	anadromous	2.14917	0.768227	2.28501						0.517647	0.131188	0.57091						1.82849	2.81561	0.768227	3.04012	2.0242	1.19558					0.235588	0.225226	0.131188	0.324702	0.178598	0.179882					1.83138	2.82229	0.768884	2.96598	2.01697	1.19558
	4285	O.tshawytscha	Aysén-Ñireguao	adult	F	anadromous	1.38262								0.64595								2.10645	0.611641	2.20388	1.32489							0.429401	0.119972	0.35529	0.30309							2.11338	0.616436	2.20816	1.36274
	4286	O.tshawytscha	Aysén-Ñireguao	adult	O	(omitted)	1.34549								1.0297								0.227929	2.40314	1.55502								0.0697509	0.235525	0.243315								0.230752	2.21266
	4287	O.tshawytscha	Aysén-Ñireguao	adult	F	anadromous	2.12673	0.725383	2.08843	1.08191					0.329186	0.143437	0.380788	0.300398					2.12673	0.725383	2.08843	1.08191							0.329186	0.143437	0.380788	0.300398							1.00961	2.08394	2.58897	0.725383	1.71016	2.51098	1.84599
	4288	O.tshawytscha	Aysén-Ñireguao	adult	F	anadromous	2.04512	0.875067	1.90738						0.205807	0.125538	0.365893						2.04512	0.875067	2.0227	1.16824							0.205807	0.125538	0.225827	0.181787							2.05863	0.878355	2.03314	1.16824
	4289	O.tshawytscha	Aysén-Ñireguao	adult	F	anadromous	1.79247	0.702727	2.72068	1.63707					0.46067	0.132291	0.407657	0.385041					1.62405	2.57947	0.702727	2.72068	1.63707						0.248336	0.404899	0.132291	0.407657	0.385041						1.14439	1.6861	2.52824	0.704884	2.76869	1.97064	1.29148
	4302	O.tshawytscha	Baker-Jaramillo	adult	O	(omitted)	1.81757								0.230973
	4303	O.tshawytscha	Baker-Jaramillo	adult	F	anadromous	2.38789	0.745777	2.09183						0.390009	0.200596	0.341187						2.38789	0.745777	2.09183								0.390009	0.200596	0.341187								2.38789	0.760154	2.49292	1.97582
	4304	O.tshawytscha	Baker-Jaramillo	adult	F	anadromous	2.19514	0.759936	2.29809	1.02057					0.29063	0.216202	0.362626	0.116902					2.19514	0.759936	2.29809	1.02057							0.29063	0.216202	0.362626	0.116902							2.1955	0.764369	2.31983	1.01546
	4308	O.tshawytscha	Baker-Jaramillo	adult	F	anadromous	1.62528								0.533807								1.96897	0.762587	1.73064								0.327896	0.275761	0.309112								1.51158	2.0663	1.53017	0.681375	1.73807
	4319	O.tshawytscha	Baker-Jaramillo	adult	F	anadromous	2.23436	0.695688	2.08007	1.06615					0.49435	0.143159	0.298247	0.381218					1.93991	2.74181	0.695688	2.08007	1.37014	0.628915					0.291524	0.334397	0.143159	0.298247	0.0929815	0.127217					1.57931	2.10215	2.76669	0.697416	2.58327	2.02218	1.36682
	4335	O.tshawytscha	Baker-Jaramillo	adult	O	(omitted)	1.78872								0.451287								0.939218	2.05899	1.13788	1.9541							0.262839	0.225295	0.12777	0.238426							0.939218	2.05899	1.13788	1.9541
	4338	O.tshawytscha	Baker-Jaramillo	adult	F	anadromous	1.70021								0.607305								1.17826	2.25939	1.09724	2.01083	0.756254						0.241832	0.235386	0.299533	0.326615	0.232271						1.21889	2.26354	1.10868	2.01831	0.770402
	4340	O.tshawytscha	Baker-Jaramillo	adult	P	freshwater	0.450465								0.155953
	4204	O.tshawytscha	Petrohué-Patos	adult	F	anadromous	2.3915	0.763424	2.93862	1.87104					0.498306	0.153176	0.357772	0.310627					2.08008	3.01219	0.763424	2.93862	1.99116	1.27553					0.138507	0.354541	0.153176	0.357772	0.150411	0.190011					2.08704	2.99497	0.768425	2.94423	1.99786	1.29343
	4205	O.tshawytscha	Petrohué-Patos	adult	O	(omitted)	1.74291								0.248411
	4208	O.tshawytscha	Petrohué-Patos	adult	H	anadromous	0.493654								0.284439								1.83319	0.300499	1.17908	0.474583							0	0.102239	0.231829	0.191537							0.312255	1.19264	0.482033
	4209	O.tshawytscha	Petrohué-Patos	adult	F	anadromous	2.24352								0.609339								2.21343	3.01172	1.49306	2.95646	2.06866	1.17561					0.230088	0.350106	0.292854	0.3421	0.207603	0.237949					2.21614	3.00884	1.49879	3.16278	2.66136	2.06952	1.17291
	4210	O.tshawytscha	Petrohué-Patos	adult	F	anadromous	2.07518	0.864264	1.89481	0.487542					0.346408	0.367565	0.45579	0.389623					2.07518	0.864264	2.38409	1.63706	0.487542						0.346408	0.367565	0.362499	0.235338	0.389623						1.81551	0.380053
	4211	O.tshawytscha	Petrohué-Patos	adult	O	(omitted)	1.80755								0.292995
	4157	O.tshawytscha	Toltén-Peuco	adult	O	(omitted)	1.92394								0.279793
	4158	O.tshawytscha	Toltén-Peuco	adult	F	anadromous	1.65987								0.403886								1.90516	1.19775	1.90284	1.20215							0.235687	0.165093	0.222606	0.260467							1.90516	1.19775	1.90284	1.20215
	4160	O.tshawytscha	Toltén-Peuco	adult	O	(omitted)	1.6556								0.163268
	4162	O.tshawytscha	Toltén-Peuco	adult	F	anadromous	1.63734								0.591642								1.03929	2.02924	0.855356	2.04242	1.10872						0.280792	0.212302	0.278524	0.222572	0.382789						1.03599	2.02976	0.856348	2.03988	1.14812
	4178	O.tshawytscha	Toltén-Truful-truful	adult	F	anadromous	1.51467								0.58617								1.92417	0.739319	1.7741	1.06231	2.44554						0.254179	0.239628	0.22768	0.220094	0.186818						1.92883	0.74356	1.77786	1.05992	2.4335
	4179	O.tshawytscha	Toltén-Truful-truful	adult	O	(omitted)	1.53843								0.371597																												1.6434	1.04134	1.84325
	4181	O.tshawytscha	Toltén-Truful-truful	adult	O	(omitted)	1.39967								0.437208
	4182	O.tshawytscha	Toltén-Truful-truful	adult	F	anadromous	1.70316								0.627403								1.9824	1.07895	2.19938	0.690247							0.368375	0.400044	0.247287	0.134449							1.32299	2.08621	0.97652	2.19066	0.704101
	3745	O.tshawytscha	Aysén-Simpson	juvenile	F	freshwater	0.772544								0.150943
	3746	O.tshawytscha	Aysén-Simpson	juvenile	F	freshwater	0.867117								0.223071
	3747	O.tshawytscha	Aysén-Simpson	juvenile	F	freshwater	0.822885								0.166072
	3748	O.tshawytscha	Aysén-Simpson	juvenile	O	freshwater	0.763638								0.164919																												1.26102	0.744508
	3749	O.tshawytscha	Aysén-Simpson	juvenile	P	freshwater	0.859362								0.223574
	1153	O.kisutch	Baker-Vargas	juvenile	F	anadromous	2.26213								0.548754								1.73569	2.70527	1.7725								0.235996	0.269695	0.195754								1.73569	2.70527	1.7725
	1155	O.kisutch	Baker-Vargas	juvenile	H	anadromous	2.44296								0.482326								2.15782	3.16734	2.43215								0.243165	0.306118	0.206748								2.15782	3.16734	2.43215
	3038	O.mykiss	Aysén-Caro	adult	F	freshwater	0.813682								0.240318
	3056	O.mykiss	Aysén-Caro	adult	H	freshwater	0.752132								0.176458
	3057	O.mykiss	Aysén-Caro	adult	H	freshwater	0.865897								0.13233
[truncated: 11 more columns]
